# Supplementary material
Source: Research Square preprint supplement (doi:10.21203/rs.3.rs-9216832/v1)
Supplement: Supplementary file 1 [file 1f8b15dc78bfe1a3da303d14.doc]

**Highlights**

1. RHBC and FC have a combined effect as adsorbents;

2. The removal performance of total phosphorus (TP) reaches 86.1%;

3. RHBC phosphorus adsorption conformed to the Langmuir and Freundlich models;

4. The adsorption kinetics data of RHBC followed a pseudo-first-order model;

5. The adsorption effect of RHBC-based FC on P followed physical adsorption;
