# Supplementary material
Source: Research Square preprint supplement (doi:10.21203/rs.3.rs-9216832/v1)

# Graphical abstract

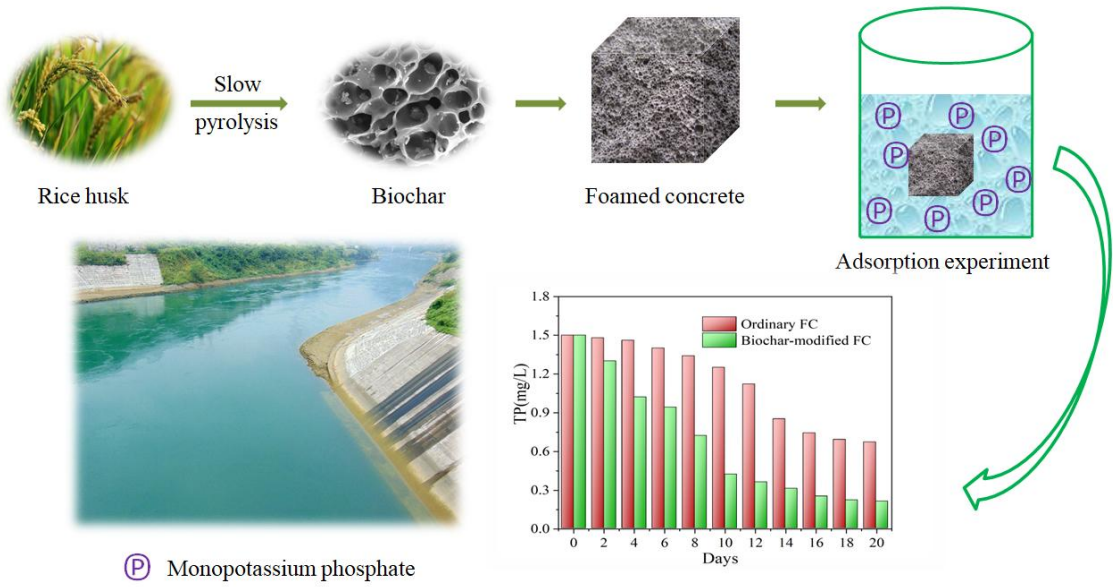

Ⓟ Monopotassium phosphate

Supplement: Supplementary file 2 [file a1ee99d352fc8945cba22134.pdf]
